# Supplementary material for: What impact does ammonia have on the microstructure of the precursor and the electrochemical performance of Ni-rich layered oxides?
Source: Royal Society of Chemistry journal article supplement (doi:10.1039/d4ta06142j), 2024-11-20
Supplement: d4ta06142j1.pdf [file d4ta06142j1.pdf]

Electronic Supplementary Information (ESI) for

## What impact does ammonia have on the microstructure of the precursor and the electrochemical performance of Ni-rich layered oxides?

Jilu Zhang<sup>1,2,†</sup>, Xinyue Zhai<sup>1,3,†</sup>, Tian Zhao<sup>1</sup>, Xiaoxia Yang<sup>1</sup>, Qin Wang<sup>1,4</sup>, Zhongjun Chen<sup>5</sup>, Meng-Cheng Chen<sup>6</sup>, Jian-Jie Ma<sup>6</sup>, Ying-Rui Lu<sup>7</sup>, Sung-Fu Hung<sup>6</sup>, Weibo Hua<sup>1,2,4,\*</sup>

<sup>1</sup> School of Chemical Engineering and Technology, Xi'an Jiaotong University, No.28, West Xianning Road, Xi'an, Shaanxi 710049, China. Email: [weibo.hua@xjtu.edu.cn](mailto:weibo.hua@xjtu.edu.cn).

<sup>2</sup> Institute for Applied Materials (IAM), Karlsruhe Institute of Technology (KIT), Hermann-von-Helmholtz-Platz 1, D-76344 Eggenstein-Leopoldshafen, Germany.

<sup>3</sup> National innovation platform (Centre) for Industry-Education Integration of Energy Storage Technology, Xi'an Jiaotong University, No.28, West Xianning Road, Xi'an, Shaanxi 710049, China.

<sup>4</sup> School of Chemical Engineering, Sichuan University, No. 24 South Section 1, Yihuan Road, 610065, Chengdu, China.

<sup>5</sup> Beijing Synchrotron Radiation Facility, Institute of High Energy Physics, Chinese Academy of Sciences, Beijing, China.

<sup>6</sup> Department of Applied Chemistry and Center for Emergent Functional Matter Science, National Yang Ming Chiao Tung University, Hsinchu 300, Taiwan.

<sup>7</sup> National Synchrotron Radiation Research Center, Hsinchu 300, Taiwan.

† These authors contributed equally to this work.

## S1 Calculations

### Crystallization kinetic

Steady state crystallization kinetics were calculated using a continuously operated Mixed-Suspension Mixed-Product Removal (MSMPR) crystallizer which is very similar to the CSTR. As this method allows for the simultaneous determination of both the growth rate and the nucleation rate. With negligible crystal breakage and agglomeration effects, the equilibrium equations for the population of a continuous MSMPR crystallizer during the stabilization phase can be described as follows:

$$\frac{d(Gn)}{dL} + \frac{n}{\tau} = 0 \quad (1)$$

where  $G$  is the overall crystal growth rate,  $n$  is the population density,  $L$  is the crystal size, and  $\tau$  is the mean residence time. The size distribution and shape of all crystals are the same in steady-state operation of the MSMPR crystalliser. The size of all crystal nuclei is zero.

Since the co-precipitated particles exhibited "size-dependent" growth, the crystal growth kinetics were analyzed on the basis of the Abegg, Stevens and Larson (ASL) growth rate equation:

$$G(L) = G^0(1 + \gamma L)^b \quad (2)$$

where  $G^0$  is the nucleus growth rate,  $\gamma$  is determined by  $\gamma = 1/G^0\tau$  and  $b$  is an empirical parameter. Thus, the size-dependent liner growth rate ( $L$ ) =  $dL/d\tau$  can be simplified to the following equation:

$$\frac{d(nG(L))}{dL} = -\frac{n}{\tau} \quad (3)$$

In combination with these equations, the population balance can be integrated as follows:

$$n = n^0(1 + \gamma L)^{-b} \exp\left[\frac{1 - (1 + \gamma L)^{1-b}}{1-b}\right] \quad (4)$$

The population density of particles in the crystalline steady state is calculated by the following equation:

$$n_i = \frac{M_T \Delta V_i}{k_v \rho_c \Delta L_i \bar{L}_i^3} \quad (5)$$

where is  $M_T$  the suspension density,  $\Delta V_i$  is the volume fraction of solids,  $k_v$  is the volume shape factor,  $\rho_c$  is the solid density,  $\Delta L_i$  is length of  $i$  channel,  $\bar{L}_i^3$  is the average particle size of the  $i$  channel.

Finally, the  $G^0$  values in both crystallisers can be calculated from the population density map of the precursors. Therefore, the nucleation rate ( $B^0$ ) can also be derived from the following equation:

$$B^0 = n^0 G^0 \quad (6)$$

### **Li-ion diffusion coefficient**

The Li-ion diffusion coefficient ( $D_{Li^+}$ ) of the electrodes during the first cycle was measured using the Galvanostatic intermittent titration technique (GITT) method. The current was interrupted after a duration of 20 min ( $\tau$ ) and relaxed for 3 h to reach a new steady state potential  $E_s$ , from which the change in the steady state voltage  $\Delta E_s$  ( $=E_s - E_0$ ) over the galvanostatic titration can be determined. This process was repeated over a voltage interval of 2.7-4.3 V. Based on the GITT measurements,  $D_{Li^+}$  can be calculated from the following equation

$$D_{Li^+} = \frac{4}{\pi t} \left( \frac{m_B V_M}{M_B S} \right)^2 \left( \frac{\Delta E_s}{\Delta E_\tau} \right)^2 \quad (7)$$

where  $m_B$  is the mass of the active material,  $V_m$  is the molar volume of the electrode material,  $M_B$  is the relative Molecular mass,  $S$  is the effective surface area of the electrode in contact with the electrolyte,  $t$  is the time,  $\Delta E_\tau$  is derived from the total change in cell voltage to eliminate iR drop during the constant current pulse  $\tau$  of the one-step GITT experiment.

### **Apparent activation energy**

Nyquist plots of the pristine samples were collected at 298.15, 308.15, 318.15 and 328.145 K (**Figure S12**) to calculate the activation energy ( $E_a$ ) by the following Arrhenius equation:

$$i_0 = RT/nFR_{ct} \quad (8)$$

$$i_0 = A \exp(-E_a/RT) \quad (9)$$

Here  $i_0$  is the exchange current,  $R_{ct}$  is charge transfer impedance,  $R$  is the gas constant,  $T$  (K) is the absolute temperature,  $A$  is a temperature-independent coefficient,  $n$  is the number of transferred electrons, and  $F$  is the Faraday constant. The linear plot of  $\ln(i_0/A)$  versus  $1/T$  is derived and then the activation energy was calculated ( $E_a = -Rk$ , where  $k$  is the slope of the fitting line).

## S2 Additional results and discussion

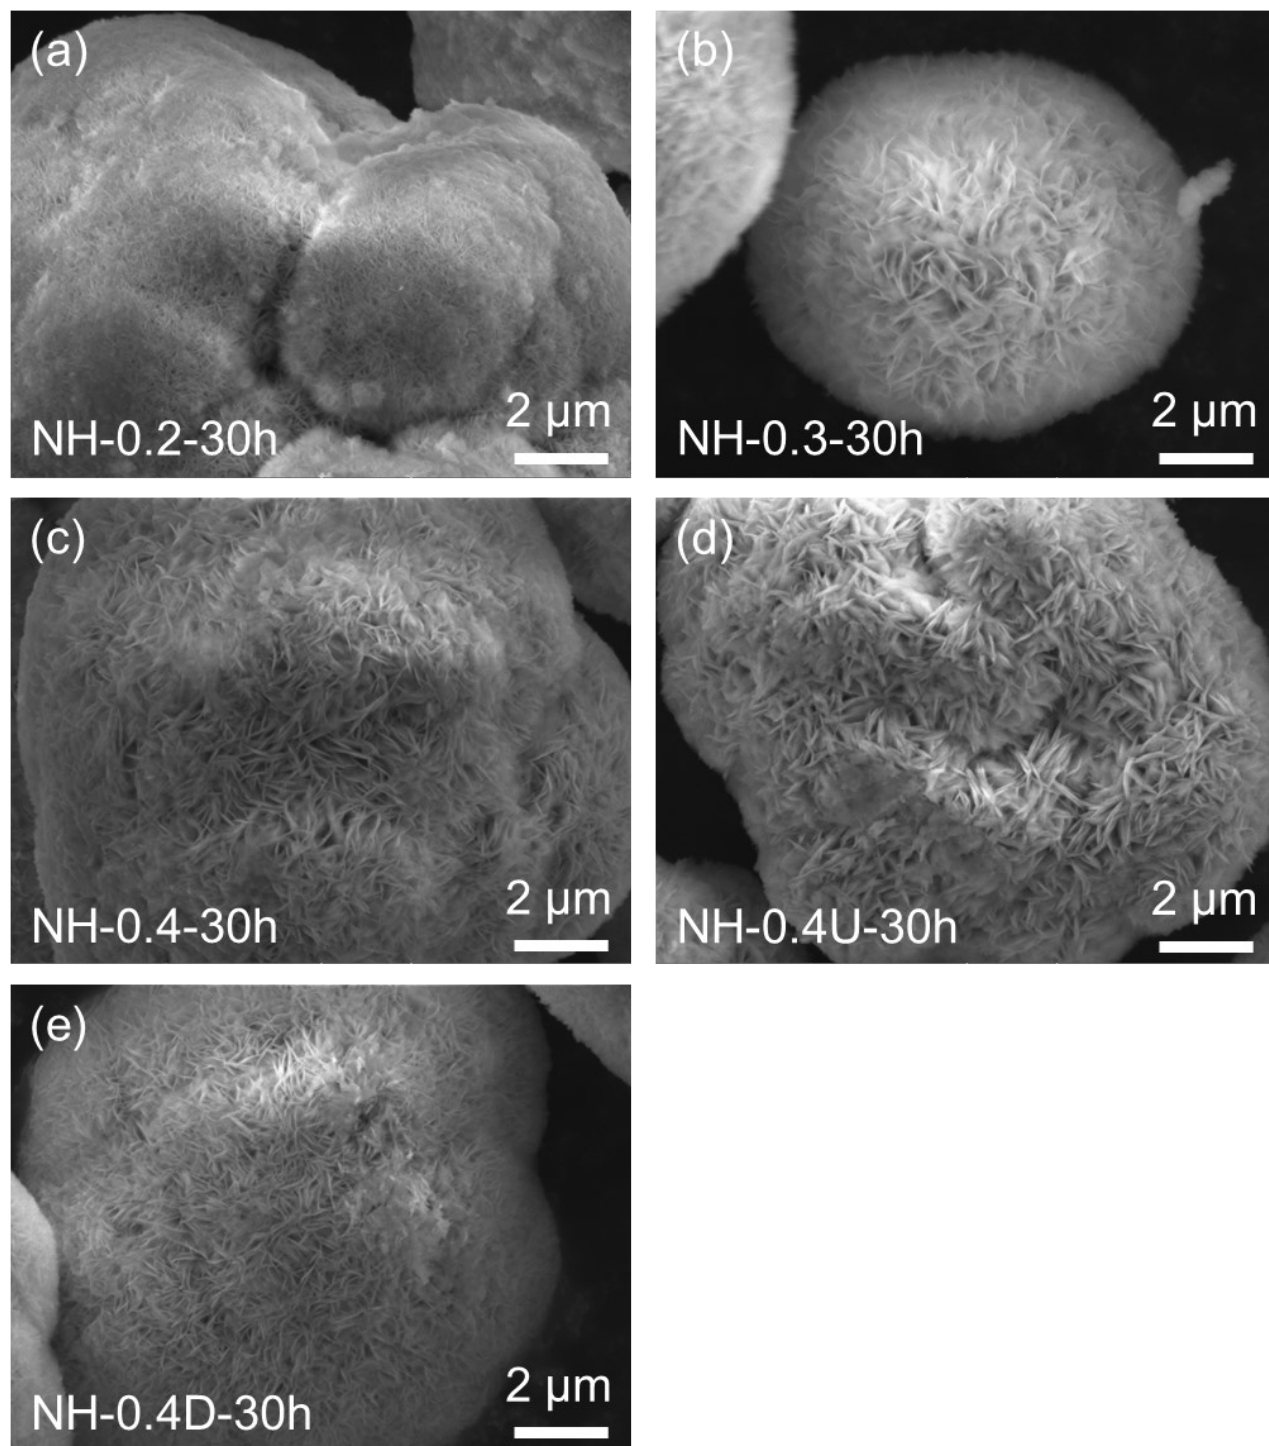

**Figure S1.** SEM images of (a) NH-0.2, (b) NH-0.3, (c) NH-0.4, (d) NH-0.4U and (e) NH-0.4D after 30 hours of reaction.

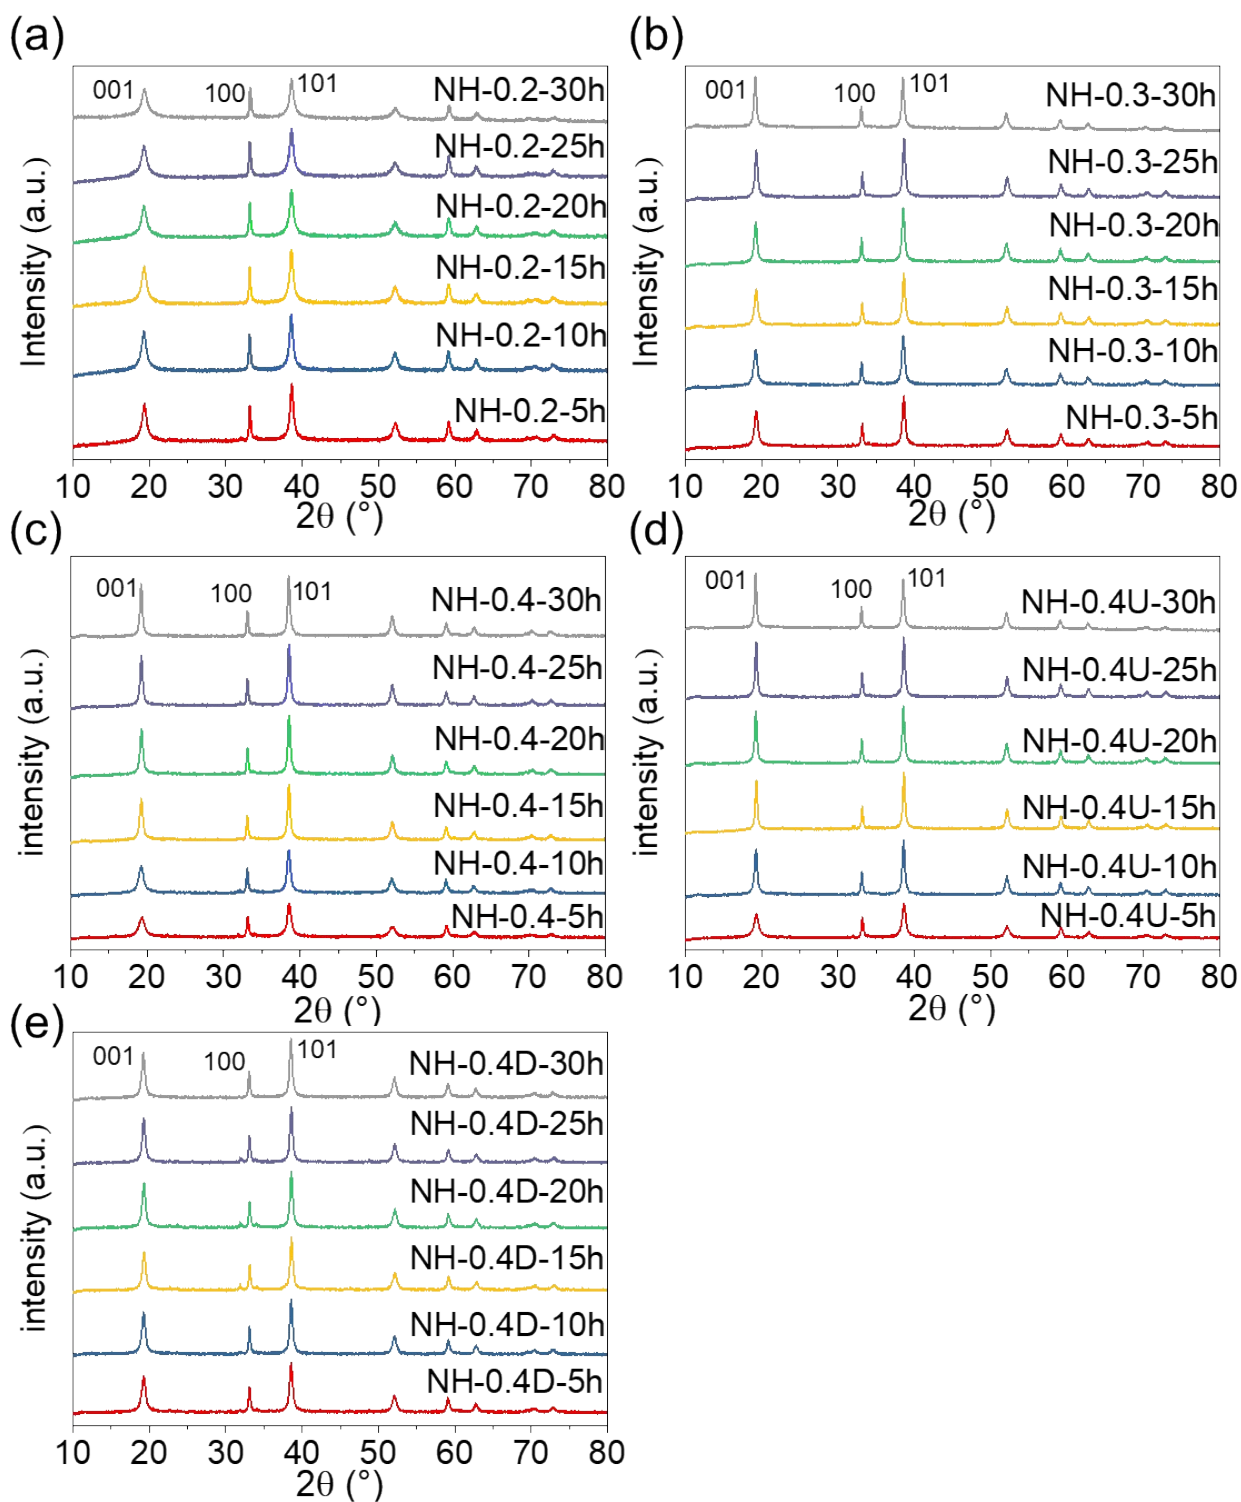

**Figure S2.** XRD pattern images of (a) NH-0.2, (b) NH-0.3, (c) NH-0.4, (d) NH-0.4U and (e) NH-0.4D at different co-precipitation reaction time (5 – 30 h).

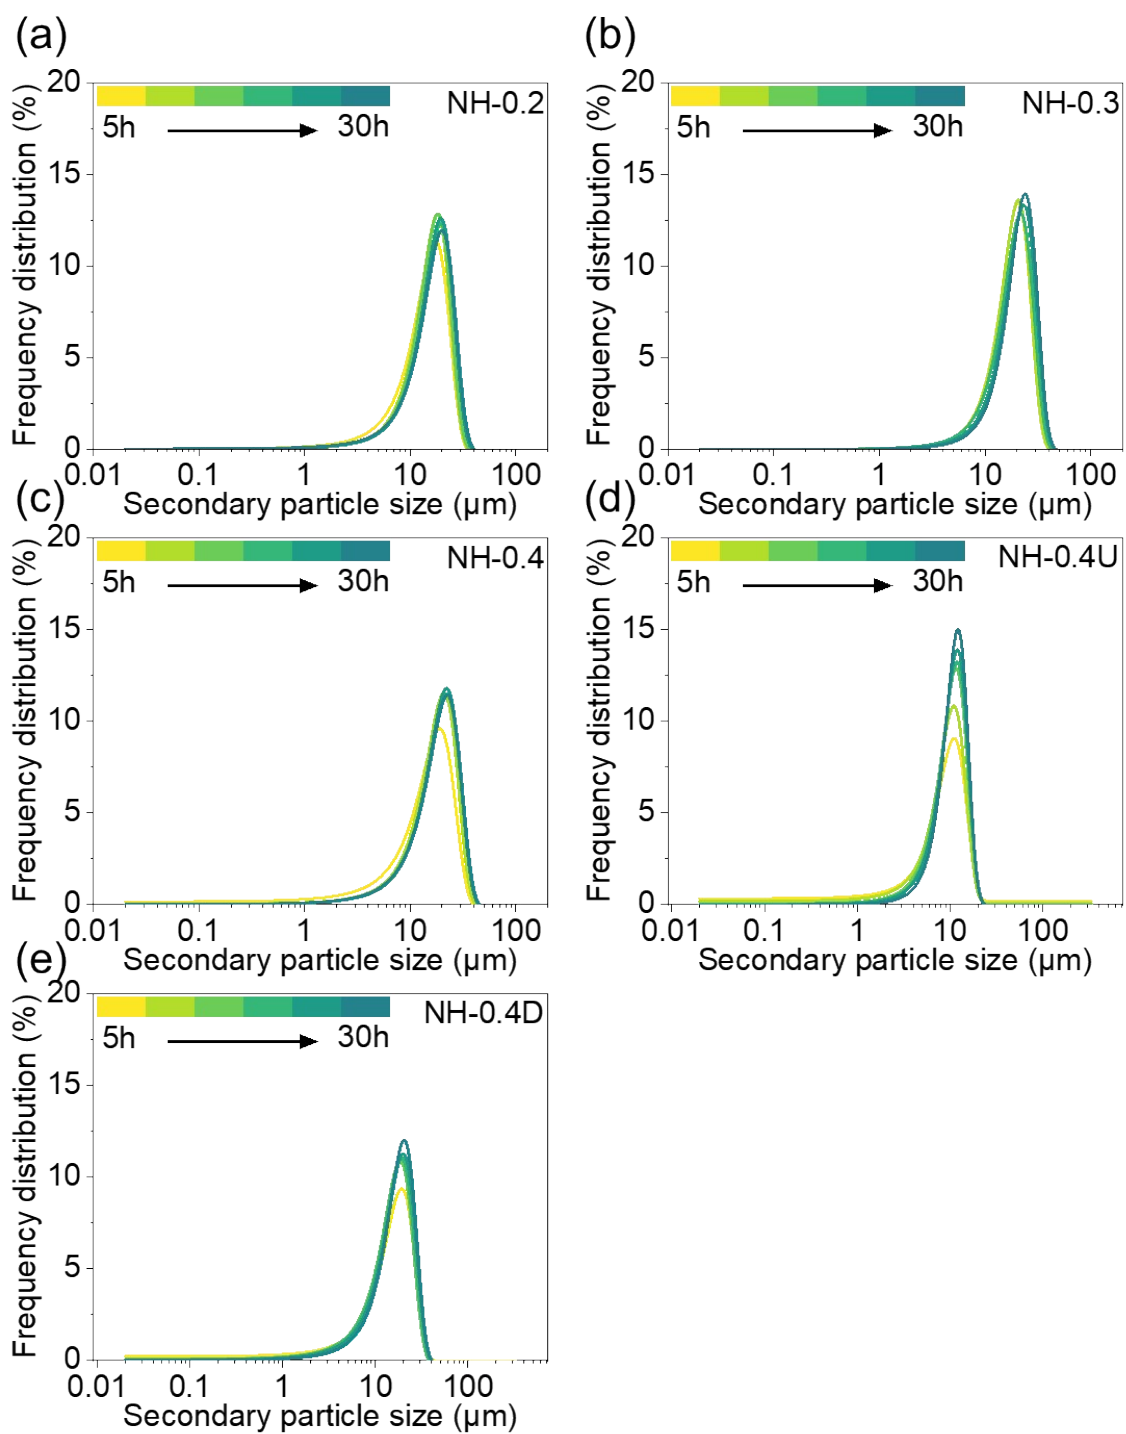

**Figure S3.** Secondary particles size distribution of (a) NH-0.2, (b) NH-0.3, (c) NH-0.4, (d) NH-0.4U and (e) NH-0.4D at different co-precipitation reaction time (5 – 30 h).

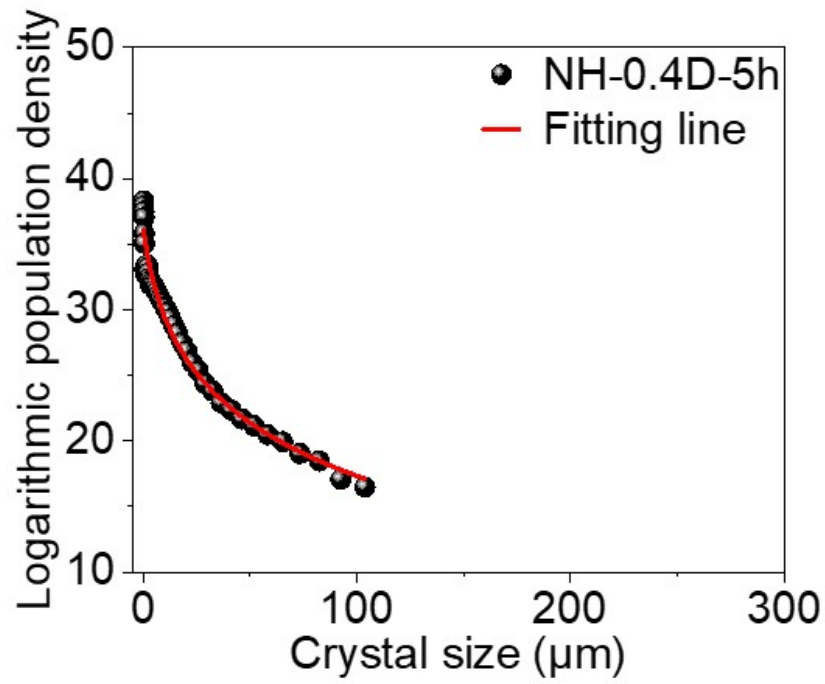

**Figure S4.** The population density distribution plots and ASL fitting results.



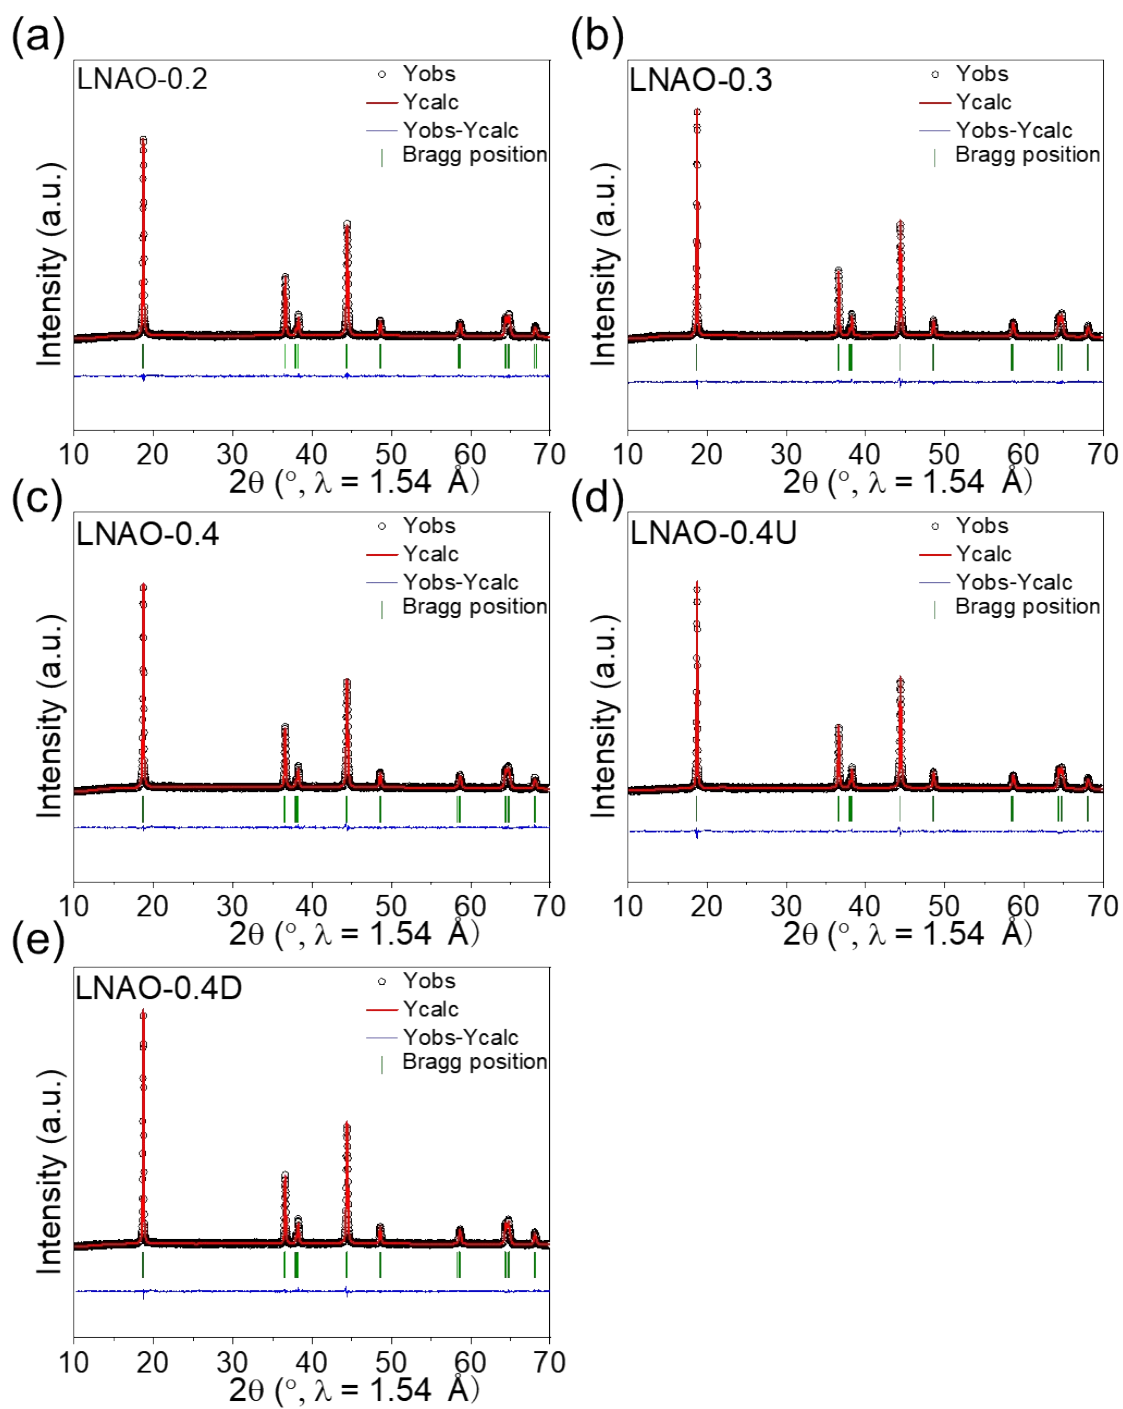

**Figure S5.** Rietveld refinement XRD patterns of (a) LNAO-0.2, (b) LNAO-0.3, (c) LNAO-0.4, (d) LNAO-0.4U and (e) LNAO-0.4D.

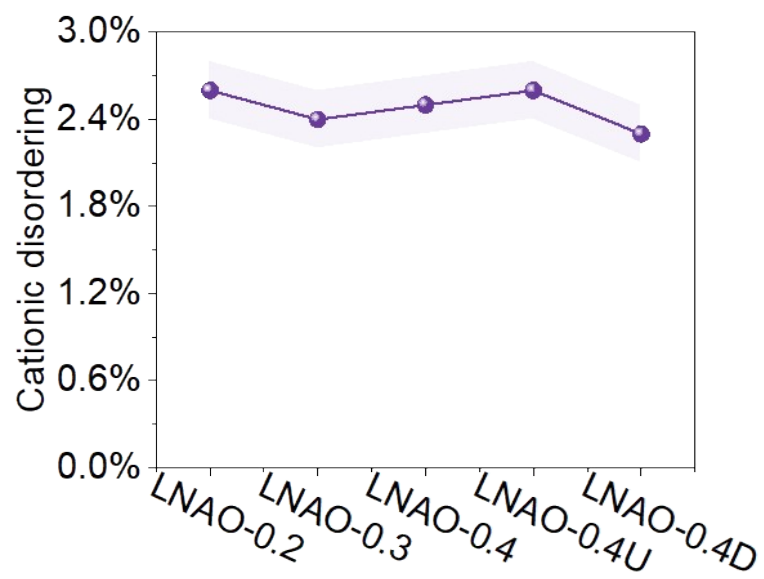

**Figure S6.** Changes in the degree of cation disorder in layered structures.

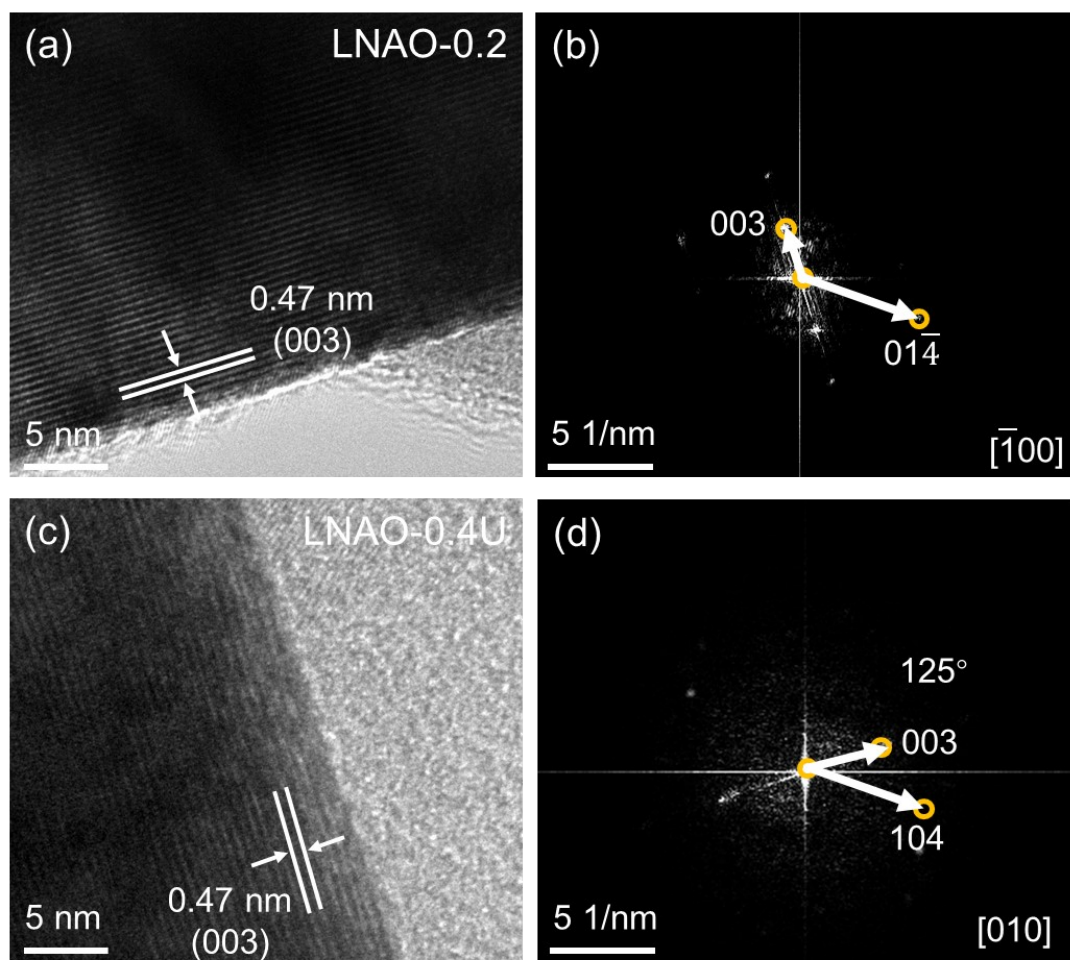

Figure S7. HRTEM images and FFT patterns of (a, b) LNAO-0.2, (c, d) LNAO-0.4U.

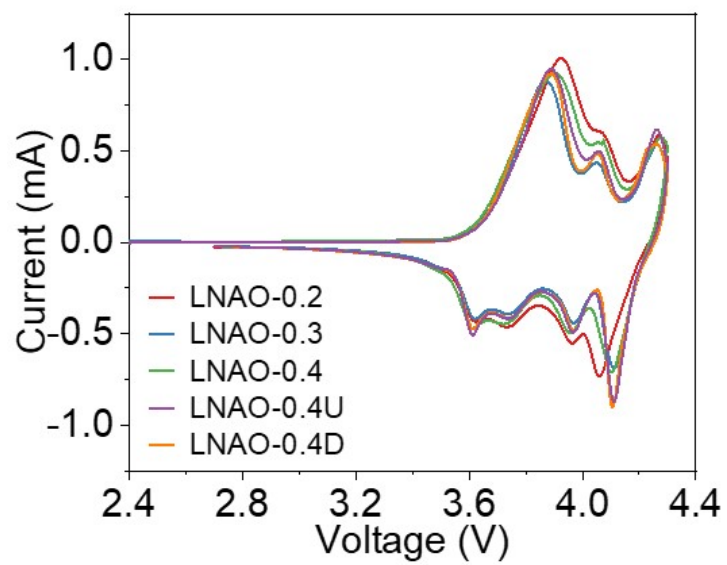

**Figure S8.** CV curves of LNAO cathodes in the voltage range of 2.7 – 4.3 V.

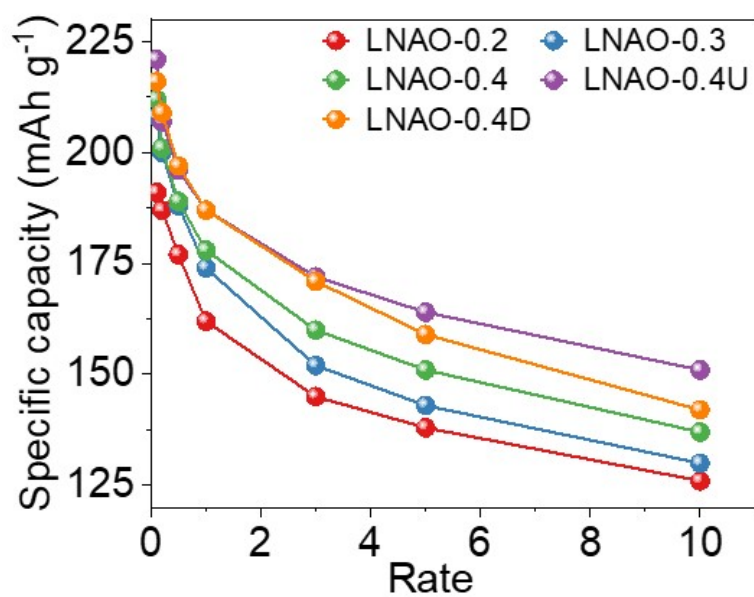

**Figure S9.** Rate performance of LNAO cathodes.

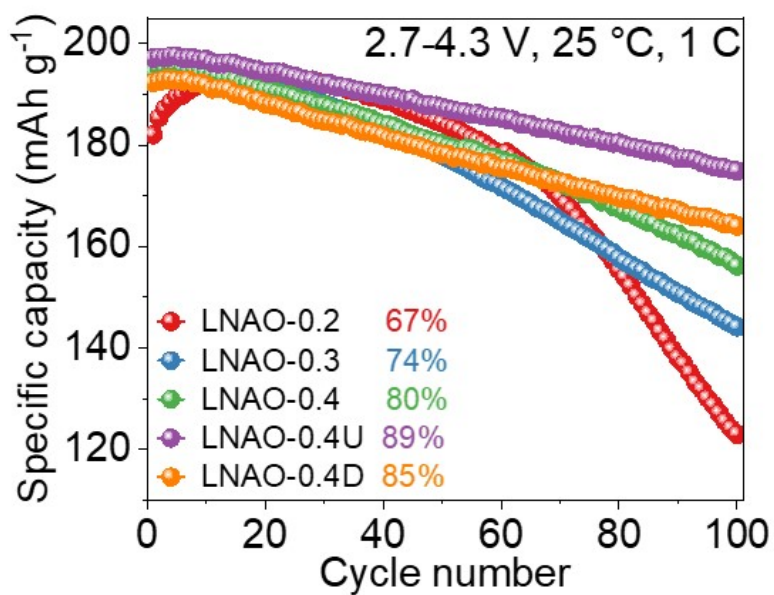

**Figure S10.** The cyclability of LNAO cathodes at 1 C in the voltage range of 2.7 – 4.3

V.

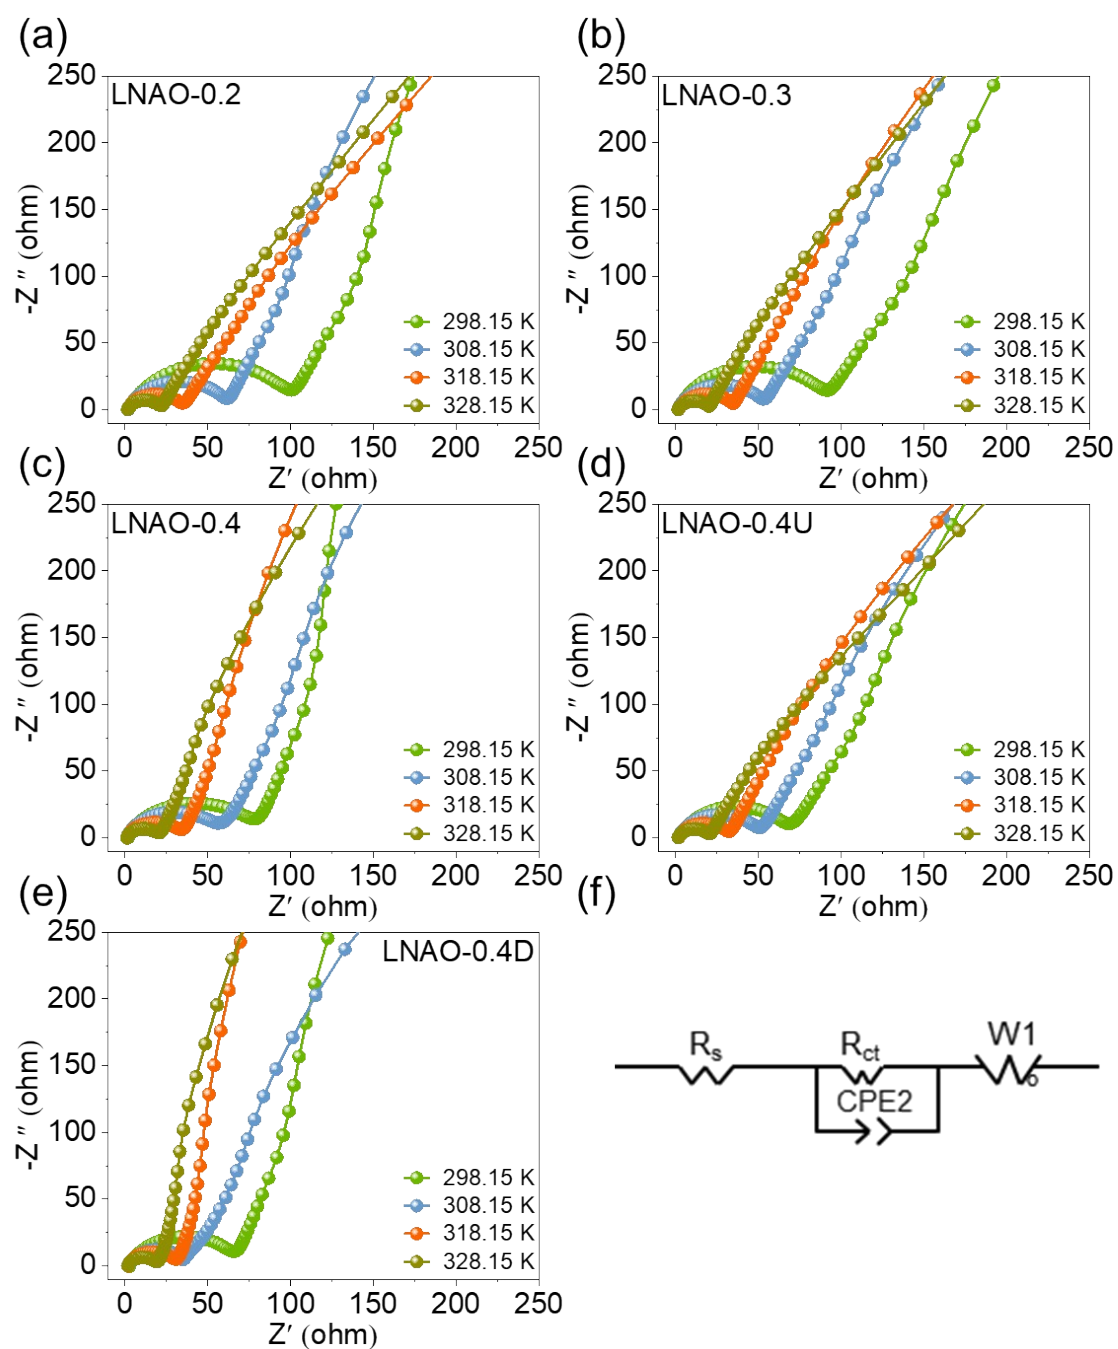

**Figure S11.** Nyquist plots of (a) LNAO-0.2, (b) LNAO-0.3, (c) LNAO-0.4, (d) LNAO-0.4U and (e) LNAO-0.4D at different temperatures; (f) equivalent circuit models used in impedance fitting.

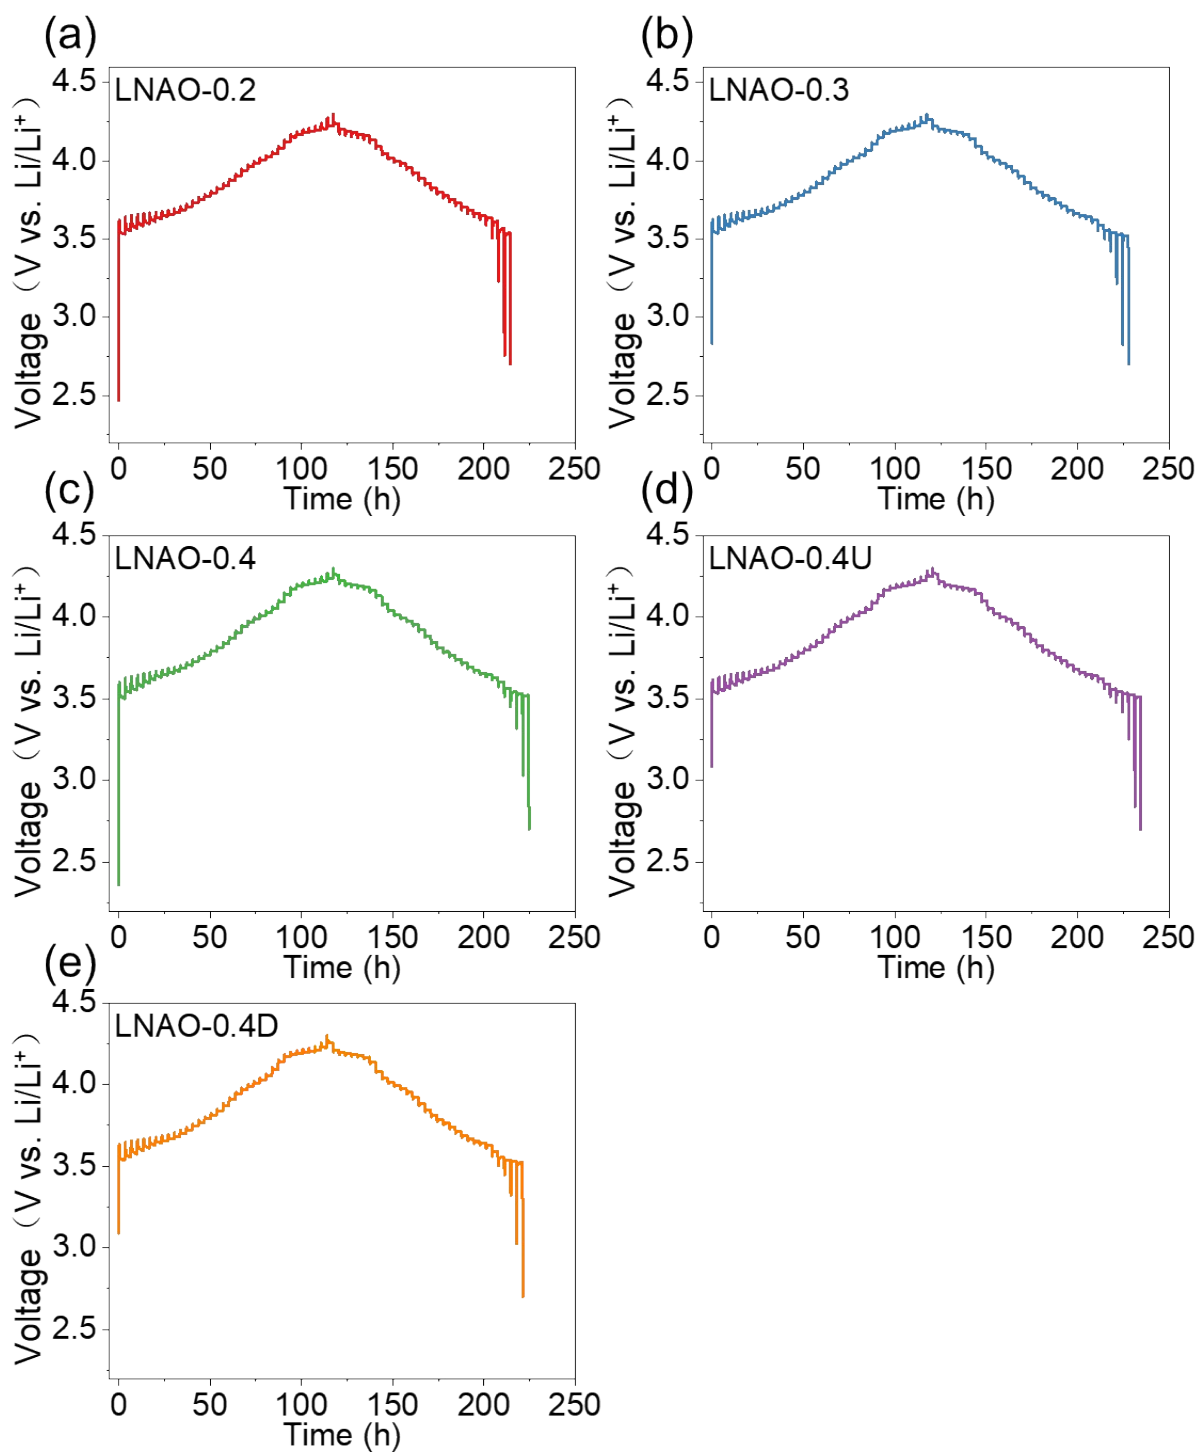

**Figure S12.** GITT profiles of (a) LNAO-0.2, (b) LNAO-0.3, (c) LNAO-0.4, (d) LNAO-0.4U, (e) LNAO-0.4D.

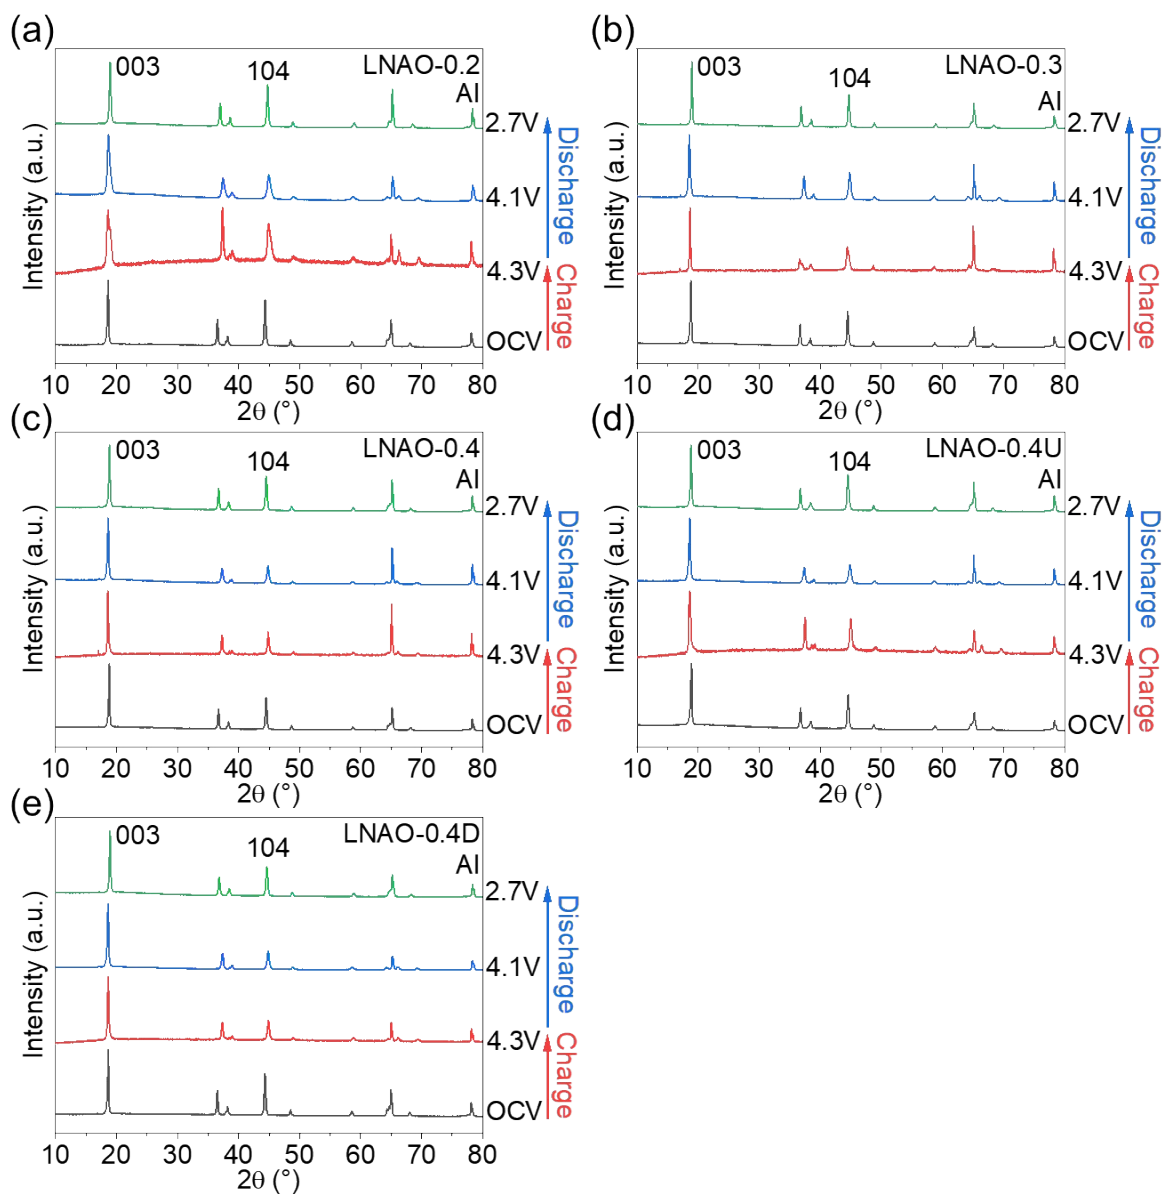

**Figure S13.** XRD pattern of (a) LNAO-0.2, (b) LNAO-0.3, (c) LNAO-0.4, (d) LNAO-0.4U and (e) LNAO-0.4D at various charge/discharge states.



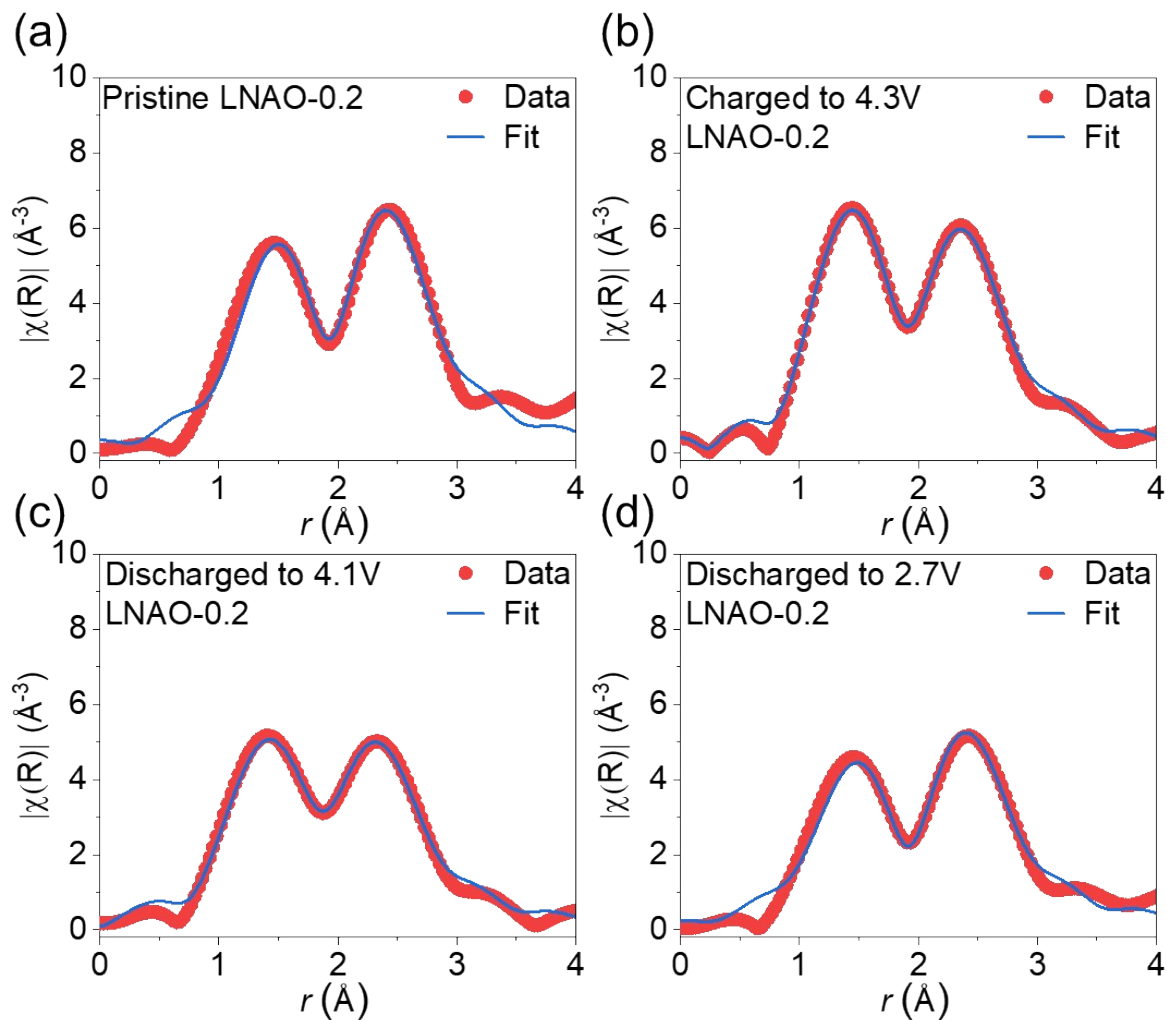

**Figure S14.**  $k^2$ -weighted Fourier transform magnitude and the Fitting of Ni K-edge EXAFS spectra for LNAO-0.2 at various charge/discharge states. (a) Pristine LNAO-0.2; (b) Charged to 4.3 V; (c) Discharged to 4.1 V; (d) Discharged to 2.7 V.

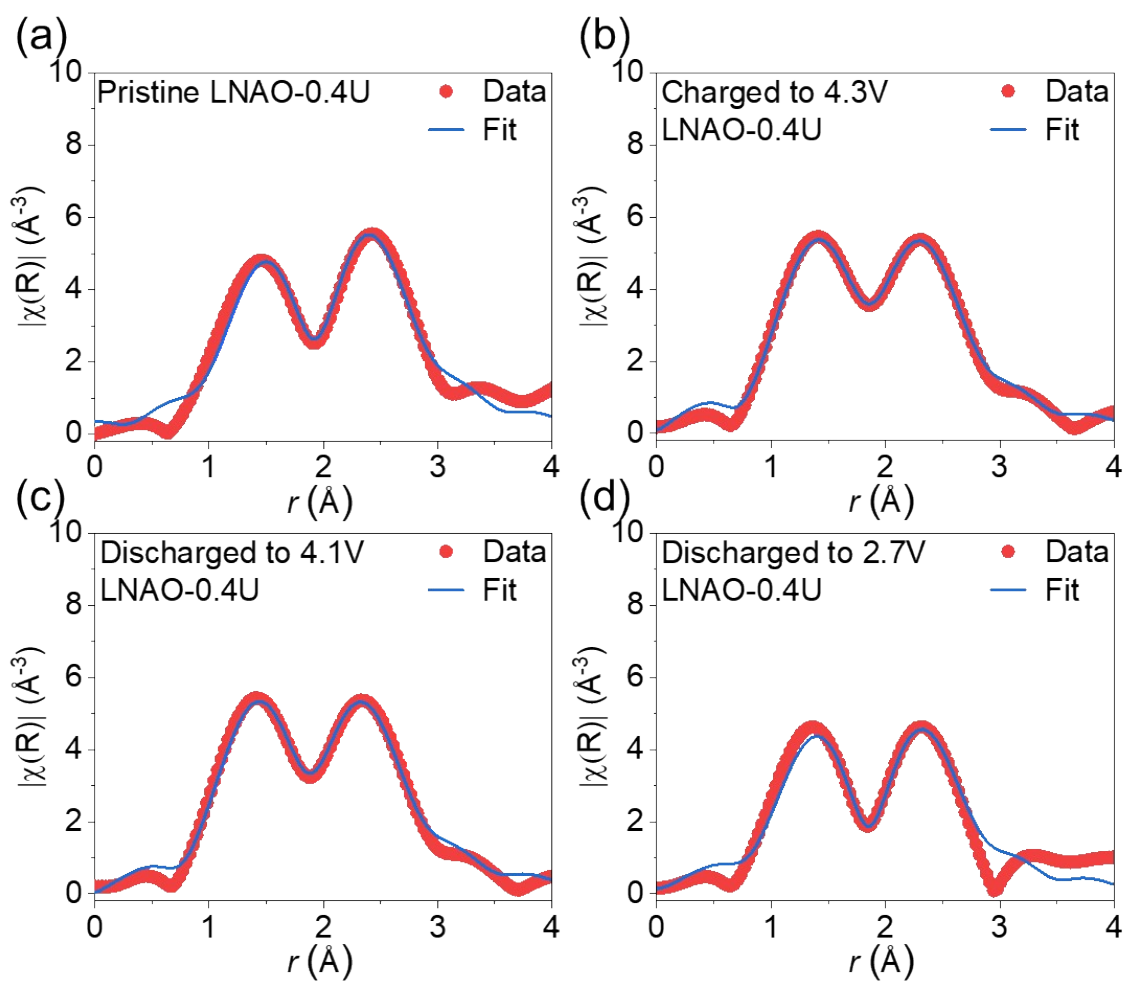

**Figure S15.**  $k^2$ -weighted Fourier transform magnitude and the Fitting of Ni K-edge EXAFS spectra for LNAO-0.4U at various charge/discharge states. (a) Pristine LNAO-0.2; (b) Charged to 4.3 V; (c) Discharged to 4.1 V; (d) Discharged to 2.7 V.

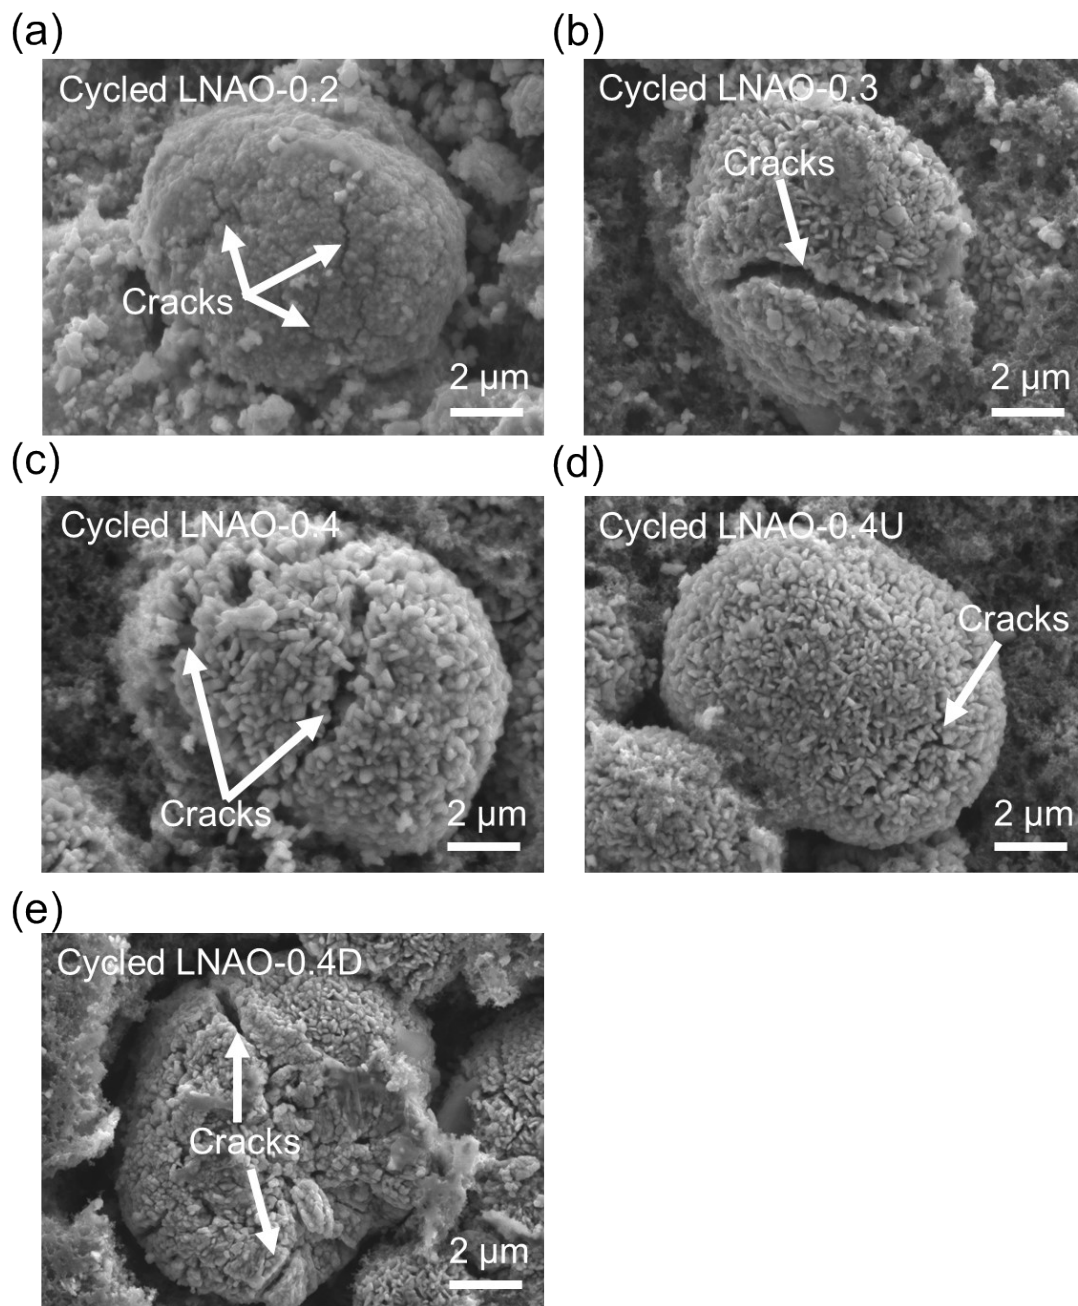

**Figure S16.** SEM images of (a) LNAO-0.2, (b) LNAO-0.3, (c) LNAO-0.4, (d) LNAO-0.4U and (e) LNAO -0.4D after 100 cycles at 1C.

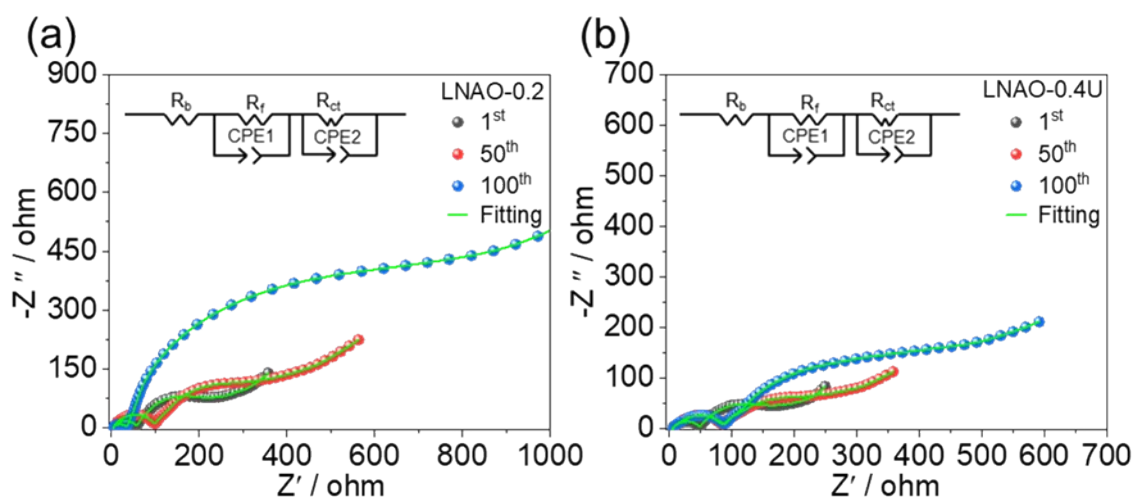

**Figure S17.** Nyquist plots of LNAO-0.2 and LNAO-0.4U in the discharged state after 1, 50 and 100 cycles, and the inset in Figure is equivalent circuit spectrogram.

The electrochemical impedance spectra of LNAO-0.2 and LNAO-0.4U at varying cycle counts are presented in Figure S17. The Nyquist plots were analyzed using equivalent circuit modeling, with the resulting impedance data summarized in Table S16. Throughout the cycling process, both the ohmic resistance ( $R_b$ ) and the surface film resistance ( $R_f$ ) remained relatively stable. However, the charge-transfer resistance ( $R_{ct}$ ) exhibited notable changes. Specifically, for the LNAO-0.2 electrodes, the  $R_{ct}$  increased from approximately 27  $\Omega$  during the initial cycle to about 421  $\Omega$  after 100 cycles. In contrast, the LNAO-0.4U electrode showed a more modest increase, rising from approximately 20  $\Omega$  in the initial cycle to around 128  $\Omega$  after 100 cycles. This smaller increase in  $R_{ct}$  for the LNAO-0.4U electrode may be attributed to its plate-like primary particles, which help mitigate microstrain and reduce the occurrence of microcracks and surface side reactions.

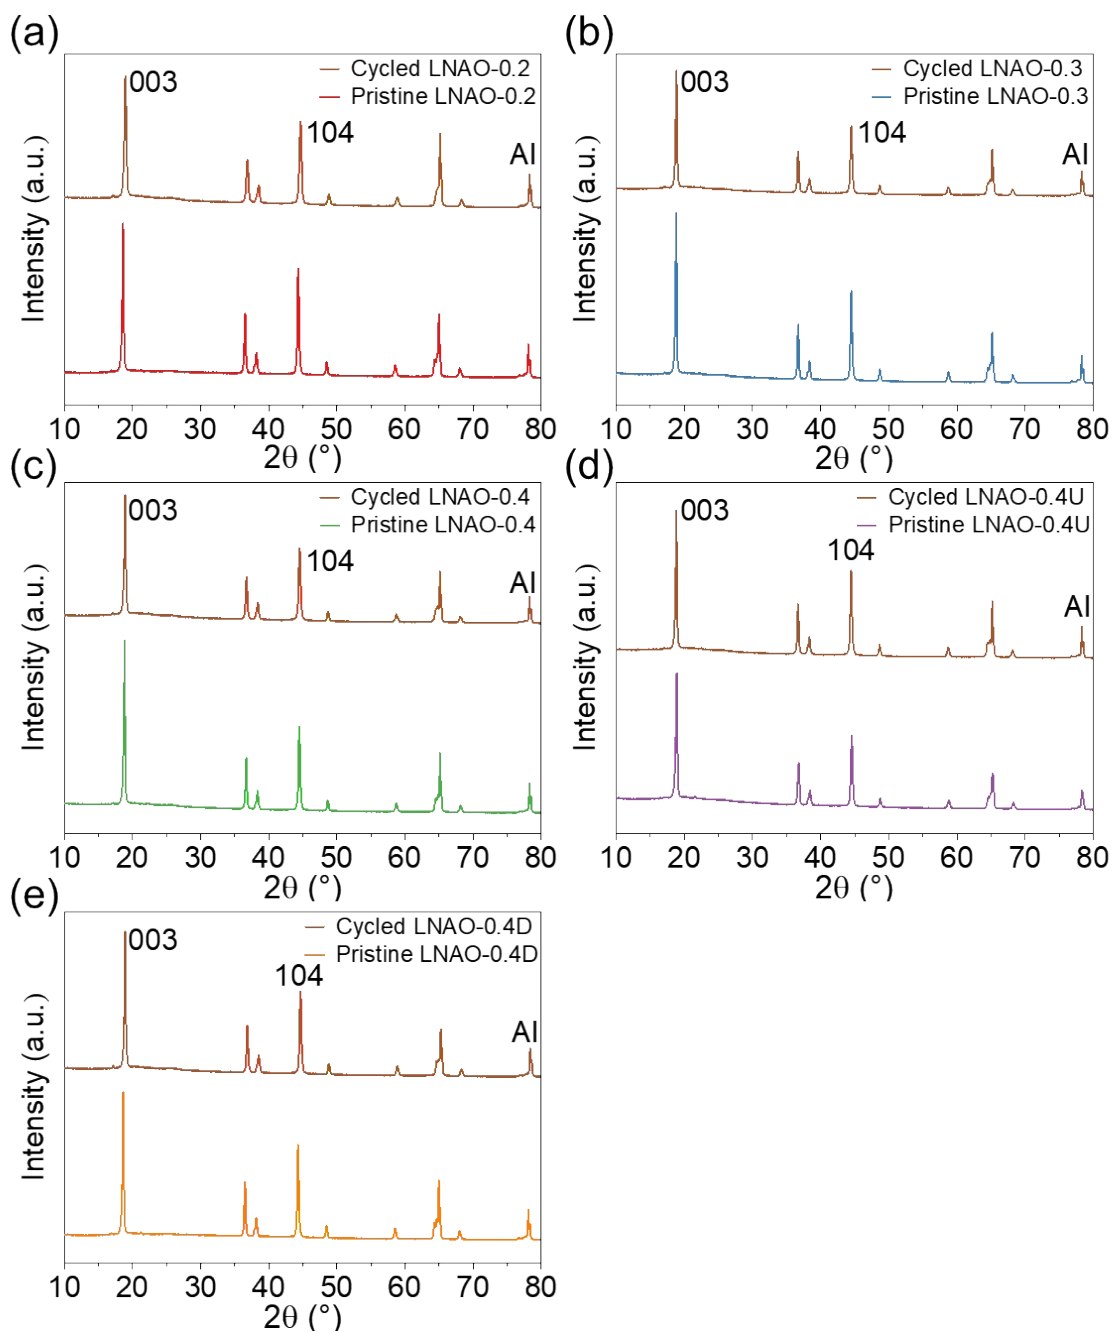

**Figure S18.** Comparison of XRD patterns of electrodes before cycling and after 100 cycles at 1C: (a) LNAO-0.2, (b) LNAO-0.3, (c) LNAO-0.4, (d) LNAO-0.4U, (e) LNAO-0.4D.

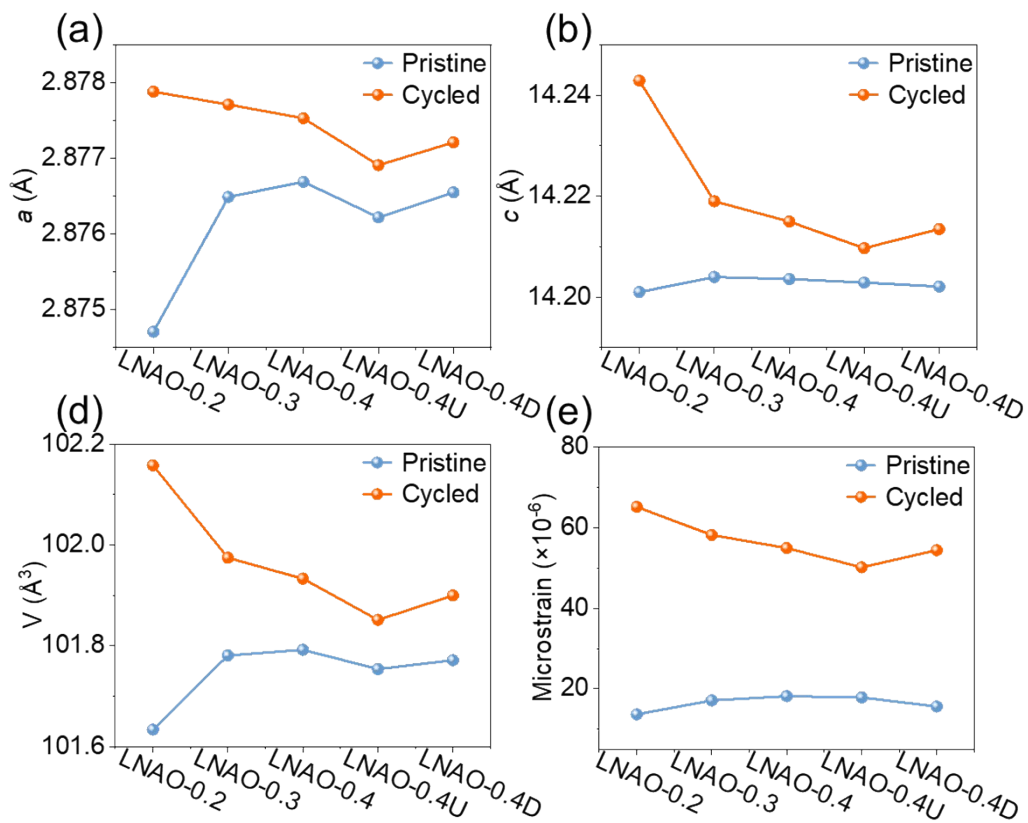

**Figure S19.** Lattice parameters (a)  $a$ , (b)  $c$  and (c) unit cell volume  $V$  of the electrodes before and after cycling; (d) the microstrain of LNAO cathodes before and after cycling

**Table S1.** The nucleation rate ( $B^0$ ) of all hydroxide precursors during synthesis

| Precursors                                   | 5 h                   | 10 h                  | 15 h                  | 20 h                  | 25 h                  | 30 h                  |
|----------------------------------------------|-----------------------|-----------------------|-----------------------|-----------------------|-----------------------|-----------------------|
| NH-0.2/Number $\text{m}^{-3} \text{s}^{-1}$  | $7.46 \times 10^{13}$ | $4.89 \times 10^{14}$ | $5.78 \times 10^{14}$ | $6.89 \times 10^{14}$ | $7.60 \times 10^{14}$ | $8.45 \times 10^{14}$ |
| NH-0.3/Number $\text{m}^{-3} \text{s}^{-1}$  | $2.39 \times 10^{13}$ | $3.95 \times 10^{13}$ | $4.38 \times 10^{13}$ | $2.24 \times 10^{14}$ | $2.20 \times 10^{14}$ | $1.83 \times 10^{14}$ |
| NH-0.4/Number $\text{m}^{-3} \text{s}^{-1}$  | $1.90 \times 10^9$    | $1.28 \times 10^{13}$ | $2.52 \times 10^{13}$ | $2.47 \times 10^{14}$ | $1.98 \times 10^{14}$ | $1.51 \times 10^{14}$ |
| NH-0.4U/Number $\text{m}^{-3} \text{s}^{-1}$ | $2.44 \times 10^{10}$ | $2.66 \times 10^8$    | $2.15 \times 10^9$    | $3.09 \times 10^9$    | $5.43 \times 10^9$    | $1.05 \times 10^{10}$ |
| NH-0.4D/Number $\text{m}^{-3} \text{s}^{-1}$ | $1.78 \times 10^9$    | $1.00 \times 10^{10}$ | $4.52 \times 10^{11}$ | $4.21 \times 10^{12}$ | $3.88 \times 10^{13}$ | $1.37 \times 10^{14}$ |

**Table S2.** The inductively coupled plasma mass spectrometer (ICP-MS) results of LNAO-0.2, LNAO-0.3, LNAO-0.4, LNAO-0.4U, and LNAO-0.4D.

| Samples   | Li    | Ni    | Al    |
|-----------|-------|-------|-------|
| LNAO-0.2  | 1.001 | 0.953 | 0.051 |
| LNAO-0.3  | 0.999 | 0.950 | 0.050 |
| LNAO-0.4  | 1.001 | 0.952 | 0.049 |
| LNAO-0.4U | 1.001 | 0.951 | 0.050 |
| LNAO-0.4D | 1.002 | 0.950 | 0.051 |



**Table S3.** Rietveld refinement results of the samples.

| Samples | $a$ (Å)   | $c$ (Å)    | $V$ (Å <sup>3</sup> ) | $c/a$  |
|---------|-----------|------------|-----------------------|--------|
| NC      | 2.8747(2) | 14.2011(3) | 101.6333(6)           | 4.9401 |
| NCA1    | 2.8765(2) | 14.2041(3) | 101.7808(6)           | 4.9380 |
| NCA2    | 2.8767(2) | 14.2036(3) | 101.7921(6)           | 4.9375 |
| NCA3    | 2.8762(2) | 14.2029(3) | 101.7538(6)           | 4.9380 |
| NA      | 2.8766(2) | 14.2021(3) | 101.7714(6)           | 4.9372 |

**Table S4.** Crystallographic parameters of LNAO-0.2.

---

Cell parameters

Space group:  $R\bar{3}m$ ,  $a = b = 2.8747(2)$  Å,  $c = 14.2011(3)$  Å,  $V = 101.6333(6)$  Å<sup>3</sup>,  
 $\alpha = \beta = 90^\circ$ ,  $\gamma = 120^\circ$

Atomic positions

| Name | site | $x$   | $y$   | $z$   | Fract |
|------|------|-------|-------|-------|-------|
| O1   | $6c$ | 0.000 | 0.000 | 0.250 | 1.000 |
| Li1  | $3a$ | 0.000 | 0.000 | 0.000 | 0.974 |
| Ni2  | $3a$ | 0.000 | 0.000 | 0.000 | 0.026 |
| Ni1  | $3b$ | 0.000 | 0.000 | 0.500 | 0.924 |
| Al   | $3b$ | 0.000 | 0.000 | 0.500 | 0.050 |
| Li2  | $3b$ | 0.000 | 0.000 | 0.500 | 0.026 |

---

Refinement parameters

$R_{wp} = 2.73$  %,  $R_p = 3.50$  %,  $\chi^2$ : 1.2

---

Note: Fract is the fractional occupancy of the atom on this site.

**Table S5.** Crystallographic parameters of LNAO-0.3.

---

Cell parameters

Space group:  $R\bar{3}m$ ,  $a = b = 2.8765(2)$  Å,  $c = 14.2041(3)$  Å,  $V = 101.7808(6)$  Å<sup>3</sup>,

$\alpha = \beta = 90^\circ$ ,  $\gamma = 120^\circ$

Atomic positions

| Name | site | $x$   | $y$   | $z$   | Fract |
|------|------|-------|-------|-------|-------|
| O1   | $6c$ | 0.000 | 0.000 | 0.250 | 1.000 |
| Li1  | $3a$ | 0.000 | 0.000 | 0.000 | 0.976 |
| Ni2  | $3a$ | 0.000 | 0.000 | 0.000 | 0.024 |
| Ni1  | $3b$ | 0.000 | 0.000 | 0.500 | 0.926 |
| Al   | $3b$ | 0.000 | 0.000 | 0.500 | 0.050 |
| Li2  | $3b$ | 0.000 | 0.000 | 0.500 | 0.024 |

---

Refinement parameters

$R_{wp} = 2.88$  %,  $R_p = 3.61$  %,  $\chi^2$ : 1.26

---

**Table S6.** Crystallographic parameters of LNAO-0.4.

---

Cell parameters

Space group:  $R\bar{3}m$ ,  $a = b = 2.8767(2)$  Å,  $c = 14.2036(3)$  Å,  $V = 101.7921(6)$  Å<sup>3</sup>,

$\alpha = \beta = 90^\circ$ ,  $\gamma = 120^\circ$

Atomic positions

| Name | site | $x$   | $y$   | $z$   | Fract |
|------|------|-------|-------|-------|-------|
| O1   | $6c$ | 0.000 | 0.000 | 0.250 | 1.000 |
| Li1  | $3a$ | 0.000 | 0.000 | 0.000 | 0.975 |
| Ni2  | $3a$ | 0.000 | 0.000 | 0.000 | 0.025 |
| Ni1  | $3b$ | 0.000 | 0.000 | 0.500 | 0.925 |
| Al   | $3b$ | 0.000 | 0.000 | 0.500 | 0.050 |
| Li2  | $3b$ | 0.000 | 0.000 | 0.500 | 0.025 |

---

Refinement parameters

$R_{wp} = 2.71$  %,  $R_p = 3.50$  %,  $\chi^2$ : 1.20

---

**Table S7.** Crystallographic parameters of LNAO-0.4U.

---

Cell parameters

Space group:  $R\bar{3}m$ ,  $a = b = 2.8762(2)$  Å,  $c = 14.2029(3)$  Å,  $V = 101.7538(6)$  Å<sup>3</sup>,  
 $\alpha = \beta = 90^\circ$ ,  $\gamma = 120^\circ$

Atomic positions

| Name | site | $x$   | $y$   | $z$   | Fract |
|------|------|-------|-------|-------|-------|
| O1   | $6c$ | 0.000 | 0.000 | 0.250 | 1.000 |
| Li1  | $3a$ | 0.000 | 0.000 | 0.000 | 0.974 |
| Ni2  | $3a$ | 0.000 | 0.000 | 0.000 | 0.026 |
| Ni1  | $3b$ | 0.000 | 0.000 | 0.500 | 0.924 |
| Al   | $3b$ | 0.000 | 0.000 | 0.500 | 0.050 |
| Li2  | $3b$ | 0.000 | 0.000 | 0.500 | 0.026 |

---

Refinement parameters

$R_{wp} = 2.91$  %,  $R_p = 3.66$  %,  $\chi^2$ : 1.27

---

**Table S8.** Crystallographic parameters of LNAO-0.4D.

---

Cell parameters

Space group:  $R\bar{3}m$ ,  $a = b = 2.8766(2)$  Å,  $c = 14.2021(3)$  Å,  $V = 101.7714(6)$  Å<sup>3</sup>,  
 $\alpha = \beta = 90^\circ$ ,  $\gamma = 120^\circ$

Atomic positions

| Name | site | $x$   | $y$   | $z$   | Fract |
|------|------|-------|-------|-------|-------|
| O1   | $6c$ | 0.000 | 0.000 | 0.250 | 1.000 |
| Li1  | $3a$ | 0.000 | 0.000 | 0.000 | 0.977 |
| Ni2  | $3a$ | 0.000 | 0.000 | 0.000 | 0.023 |
| Ni1  | $3b$ | 0.000 | 0.000 | 0.500 | 0.927 |
| Al   | $3b$ | 0.000 | 0.000 | 0.500 | 0.050 |
| Li2  | $3b$ | 0.000 | 0.000 | 0.500 | 0.023 |

---

Refinement parameters

$R_{wp} = 2.70$  %,  $R_p = 3.50$  %,  $\chi^2$ : 1.49

---

**Table S9.** Rate performances of the electrodes.

| Electrodes                    | 0.1 C | 0.2 C | 0.5 C | 1 C | 3 C | 5 C | 10 C |
|-------------------------------|-------|-------|-------|-----|-----|-----|------|
| LNAO-0.2/mAh g <sup>-1</sup>  | 191   | 187   | 177   | 162 | 145 | 138 | 126  |
| LNAO-0.3/mAh g <sup>-1</sup>  | 208   | 200   | 188   | 174 | 152 | 143 | 130  |
| LNAO-0.4/mAh g <sup>-1</sup>  | 212   | 201   | 189   | 178 | 160 | 151 | 137  |
| LNAO-0.4U/mAh g <sup>-1</sup> | 221   | 207   | 196   | 187 | 172 | 164 | 151  |
| LNAO-0.4D/mAh g <sup>-1</sup> | 216   | 209   | 197   | 187 | 171 | 159 | 142  |

**Table S10.** Charge/discharge capacity and coulomb efficiency (CE) at 0.1C

| Electrodes | Charge specific<br>capacity/mAh g <sup>-1</sup> | Discharge specific<br>capacity/mAh g <sup>-1</sup> | 1 <sup>st</sup> cycle CE |
|------------|-------------------------------------------------|----------------------------------------------------|--------------------------|
| LNAO-0.2   | 238                                             | 191                                                | 80%                      |
| LNAO-0.3   | 238                                             | 208                                                | 87%                      |
| LNAO-0.4   | 241                                             | 212                                                | 88%                      |
| LNAO-0.4U  | 241                                             | 221                                                | 91%                      |
| LNAO-0.4D  | 242                                             | 216                                                | 89%                      |



**Table S11.** Energy density of the electrodes.

| Item                                     | LNAO-02 | LNAO-0.3 | LNAO-0.4 | LNAO-0.4U | LNAO-0.4D |
|------------------------------------------|---------|----------|----------|-----------|-----------|
| Energy density<br>(Wh kg <sup>-1</sup> ) | 742     | 803      | 820      | 850       | 834       |

**Table S12.** Calculated apparent activation energies ( $E_a$ ) for lithium ion insertion into different cathode materials.

| Item       | LNAO-02         | LNAO-0.3        | LNAO-0.4        | LNAO-0.4U       | LNAO-0.4D       |
|------------|-----------------|-----------------|-----------------|-----------------|-----------------|
| $E_a$ (eV) | $0.43 \pm 0.02$ | $0.40 \pm 0.02$ | $0.38 \pm 0.02$ | $0.33 \pm 0.02$ | $0.34 \pm 0.02$ |

**Table S13.** Capacity retentions of the electrodes at 1C.

| Item                                   | LNAO-02 | LNAO-0.3 | LNAO-0.4 | LNAO-0.4U | LNAO-0.4D |
|----------------------------------------|---------|----------|----------|-----------|-----------|
| Capacity retention after<br>100 cycles | 67%     | 74%      | 80%      | 89%       | 85%       |

**Table S14.** Curve fitting results for the Ni K-edge EXAFS spectra of LNAO-0.2 at different charge/discharge states.

| State               | Bond  | CN | $\sigma^2$ (Å <sup>2</sup> ) | $S_0^2$ | R(Å)     | R-factor |
|---------------------|-------|----|------------------------------|---------|----------|----------|
| Pristine            | Ni-O  | 6  | 0.0068(1)                    | 0.68    | 1.946(5) | 0.0056   |
|                     | Ni-TM | 6  | 0.0040(1)                    | 0.68    | 2.878(5) | 0.0056   |
| Charge to 4.3 V     | Ni-O  | 6  | 0.0021(1)                    | 0.68    | 1.876(5) | 0.0053   |
|                     | Ni-TM | 6  | 0.0027(1)                    | 0.68    | 2.829(5) | 0.0053   |
| Discharge to 4.1 V  | Ni-O  | 6  | 0.0026(1)                    | 0.68    | 1.883(5) | 0.0094   |
|                     | Ni-TM | 6  | 0.0033(1)                    | 0.68    | 2.828(5) | 0.0094   |
| Discharged to 2.7 V | Ni-O  | 6  | 0.0091(1)                    | 0.68    | 1.936(5) | 0.0047   |
|                     | Ni-TM | 6  | 0.0057(1)                    | 0.68    | 2.872(5) | 0.0047   |

**Table S15.** Curve fitting results for the Ni K-edge EXAFS spectra of LNAO-0.4U at different charge/discharge states.

| State                 | Bond  | CN | $\sigma^2$ (Å <sup>2</sup> ) | $S_0^2$ | R(Å)     | R-factor |
|-----------------------|-------|----|------------------------------|---------|----------|----------|
| Pristine              | Ni-O  | 6  | 0.0067(1)                    | 0.68    | 1.947(5) | 0.0076   |
|                       | Ni-TM | 6  | 0.0043(1)                    | 0.68    | 2.878(5) | 0.0076   |
| Charge to<br>4.3 V    | Ni-O  | 6  | 0.0015(1)                    | 0.68    | 1.879(5) | 0.0093   |
|                       | Ni-TM | 6  | 0.0025(1)                    | 0.68    | 2.834(5) | 0.0093   |
| Discharge to<br>4.1 V | Ni-O  | 6  | 0.0022(1)                    | 0.68    | 1.886(5) | 0.0016   |
|                       | Ni-TM | 6  | 0.0027(1)                    | 0.68    | 2.831(5) | 0.0016   |
| Discharged            | Ni-O  | 6  | 0.0085(1)                    | 0.68    | 1.942(5) | 0.0022   |
|                       | Ni-TM | 6  | 0.0077(1)                    | 0.68    | 2.875(5) | 0.0022   |

Table S16 Fitting results of equivalent circuit from Nyquist curves in **Figure S17**.

| Samples   | Cycles            | $R_b$ ( $\Omega$ ) | $R_f$ ( $\Omega$ ) | $R_{ct}$ ( $\Omega$ ) |
|-----------|-------------------|--------------------|--------------------|-----------------------|
|           | 1 <sup>st</sup>   | $4 \pm 1$          | $22 \pm 5$         | $27 \pm 5$            |
| LNAO-0.2  | 50 <sup>th</sup>  | $4 \pm 1$          | $31 \pm 5$         | $112 \pm 10$          |
|           | 100 <sup>th</sup> | $4 \pm 1$          | $39 \pm 5$         | $421 \pm 10$          |
|           | 1 <sup>st</sup>   | $3 \pm 1$          | $25 \pm 5$         | $20 \pm 5$            |
| LNAO-0.4U | 50 <sup>th</sup>  | $3 \pm 1$          | $35 \pm 5$         | $26 \pm 5$            |
|           | 100 <sup>th</sup> | $3 \pm 1$          | $38 \pm 5$         | $128 \pm 10$          |
